# Supplementary material for: Rare-Earth-Doped Nanoparticles for Short-Wave Infrared Fluorescence Bioimaging and Molecular Targeting of αVβ3-Expressing Tumors
Source: PubMed Central journal article supplement — Mol Imaging. 2018 Sep 24;17:1536012118799131. doi: 10.1177/1536012118799131 (PMC6153542; doi:10.1177/1536012118799131), 2018-09-24
Supplement: Supplemental_Figures.pdf [file Supplemental_Figures.pdf]

**As-synthesized  
REs**

**PEGylated  
REs**

**Integrin-targeted  
REs**

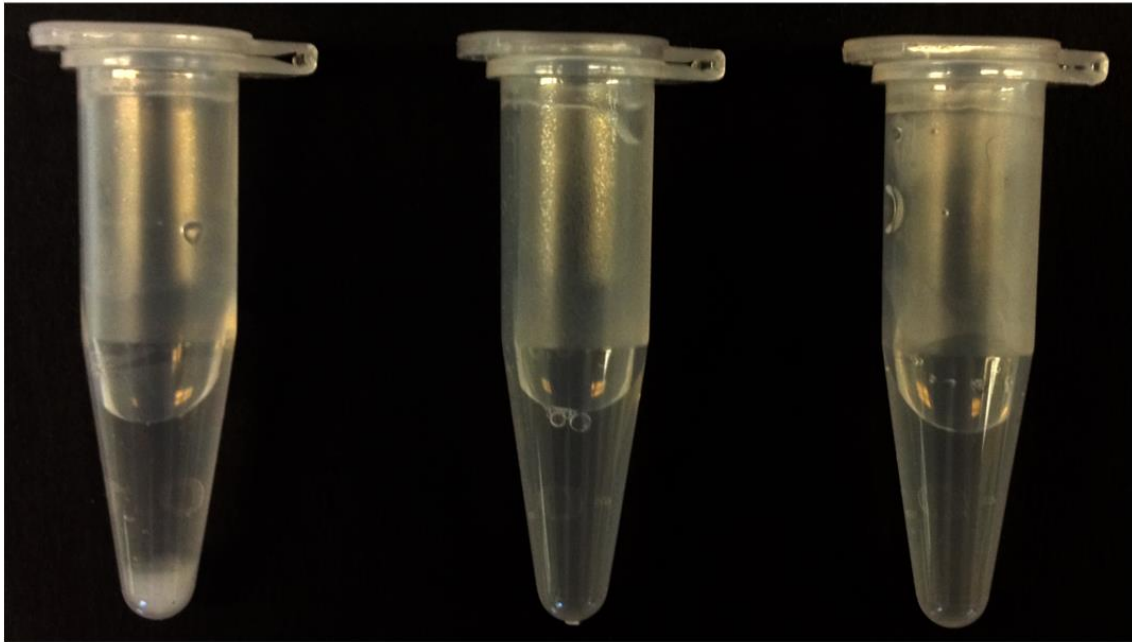

Supplemental Figure S1 - Image of various formulations of REs in solution shows that in contrast to the as-synthesized REs, both PEGylated and functionalized REs are readily dispersed in aqueous buffer.

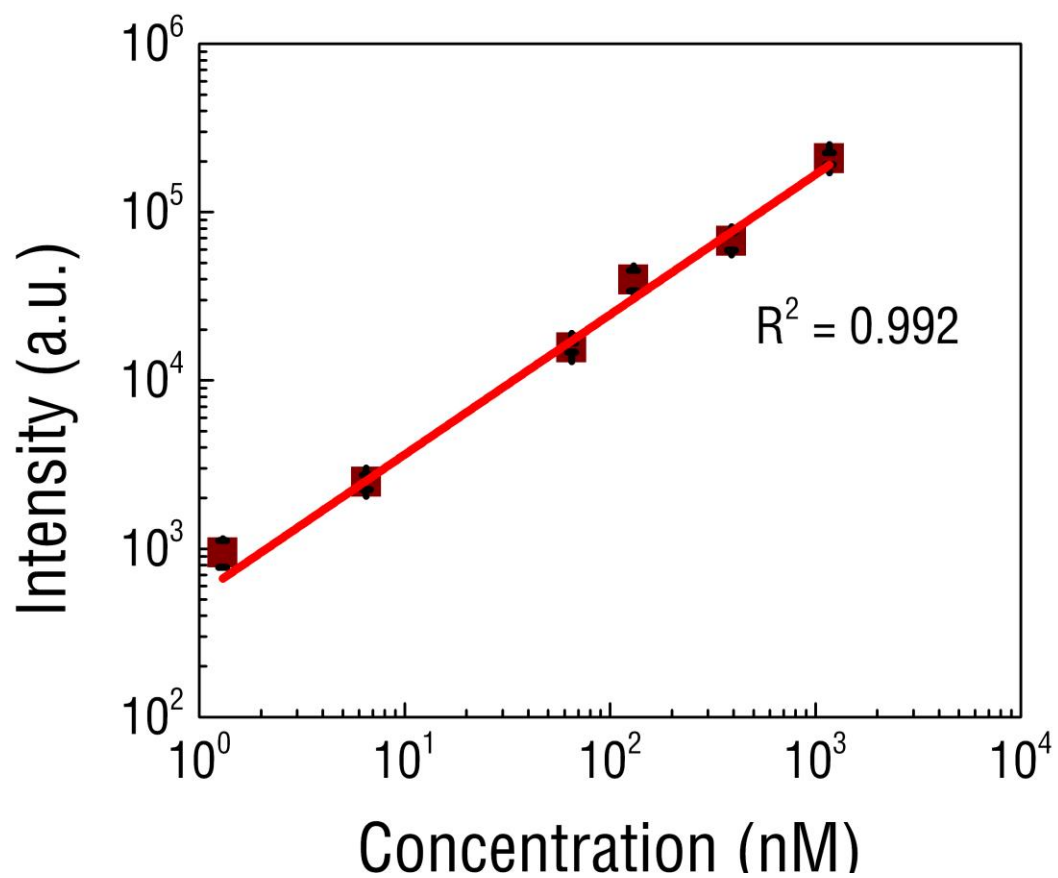

Supplemental Figure S2 – Calibration curve of the SWIR imaging system through serial dilution of REs reveals a strongly linear relationship between SWIR signal intensity and RE concentration.

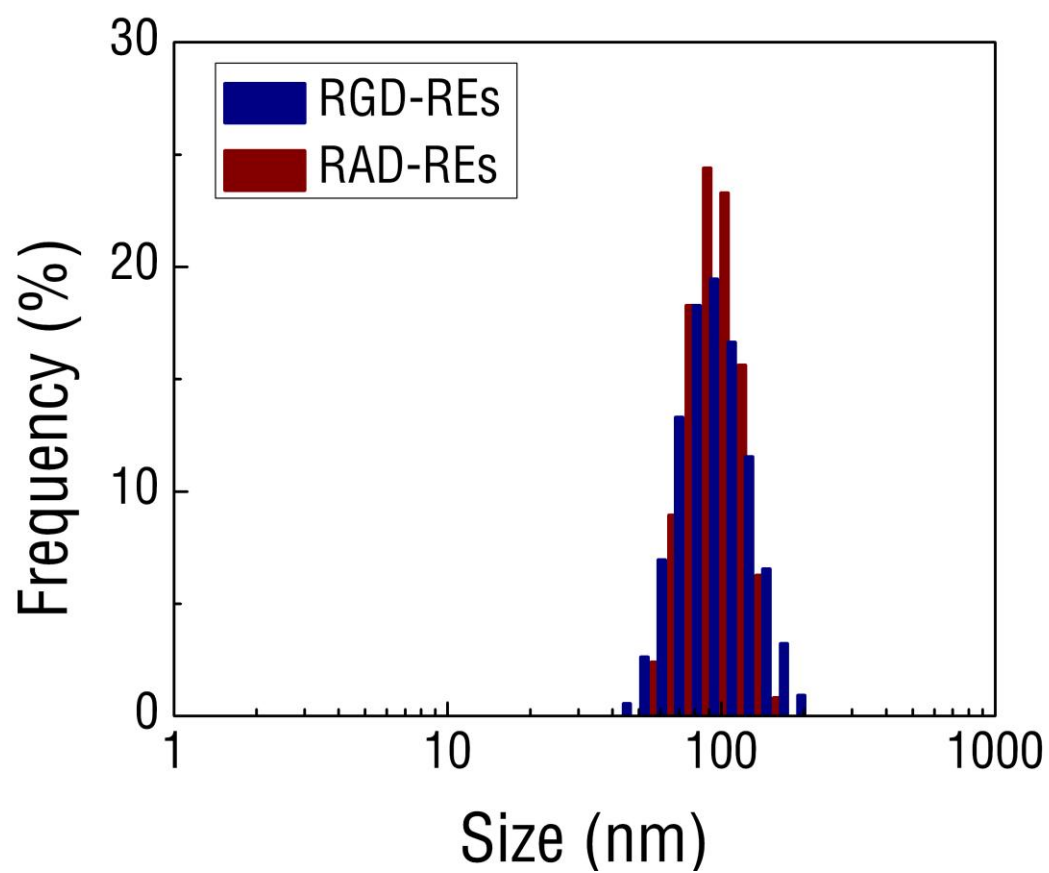

Supplemental Figure S3 – Size distribution of functionalized REs in PBS shows similar, narrow size Distribution.

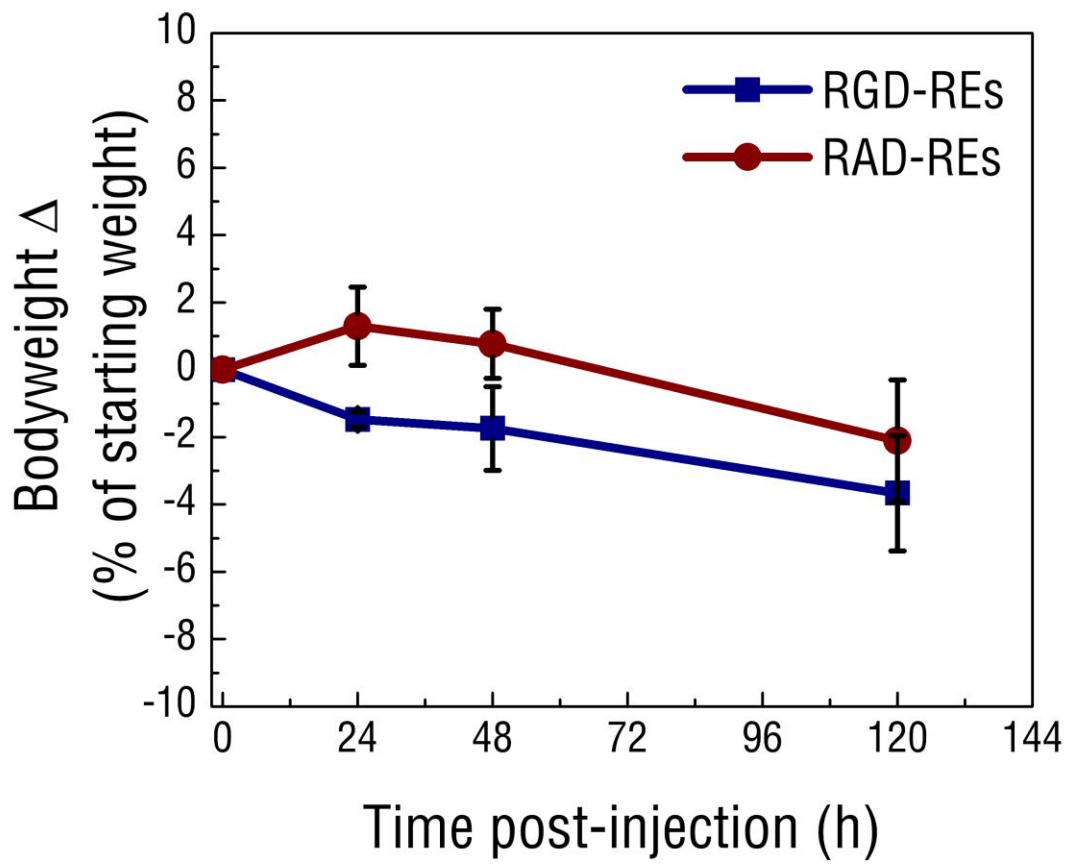

Supplemental Figure S4 – Changes in the bodyweight of mice exposed systemically with functionalized REs.
